# Supplementary material for: Case report: Preclinical efficacy of NEDD8 and proteasome inhibitors in patient-derived models of signet ring high-grade mucinous colorectal cancer from a Lynch syndrome patient
Source: PubMed Central journal article supplement (PMC9932521; doi:10.3389/fonc.2023.1130852), 2023-02-02
Supplement: Table_1.pdf [file Table_1.pdf]

| ID           | gene   | # locus hg38            | type  | length | genotype | depth | VAF  | function           | codon | exon | protein     | coding     | sift | polyphen | grantham |
|--------------|--------|-------------------------|-------|--------|----------|-------|------|--------------------|-------|------|-------------|------------|------|----------|----------|
| Tumor Tissue | CTNNB1 | chr3:41224642-41224643  | SNV   | 1      | C/T      | 1216  | 0.07 | missense           | TTT   | 3    | p.Ser45Phe  | c.134C>T   | 0.0  | 0.996    | 155.0    |
|              | KRAS   | chr12:25245345-25245346 | SNV   | 1      | C/T      | 889   | 0.05 | missense           | GAC   | 2    | p.Gly13Asp  | c.38G>A    | 0.0  | 0.803    | 94.0     |
|              | GNAS   | chr20:58909366-58909367 | SNV   | 1      | G/A      | 836   | 0.04 | missense           | CAT   | 8    | p.Arg201His | c.602G>A   | 0.0  | 1.0      | 29.0     |
| PDX          | CTNNB1 | chr3:41224642-41224643  | SNV   | 1      | C/T      | 1450  | 1    | missense           | TTT   | 3    | p.Ser45Phe  | c.134C>T   | 0.0  | 0.996    | 155.0    |
|              | KRAS   | chr12:25245345-25245346 | SNV   | 1      | C/T      | 1993  | 0.49 | missense           | GAC   | 2    | p.Gly13Asp  | c.38G>A    | 0.0  | 0.803    | 94.0     |
|              | GNAS   | chr20:58909366-58909367 | SNV   | 1      | G/A      | 350   | 0.48 | missense           | CAT   | 8    | p.Arg201His | c.602G>A   | 0.0  | 1.0      | 29.0     |
|              | ARID1A | chr1:26779342-26779343  | INDEL | 1      | AG/A     | 1125  | 0.18 | frameshiftDeletion | TCG   | 20   | p.Ile1816fs | c.5445delG |      |          |          |
|              | ERBB2  | chr17:39725364-39725365 | SNV   | 1      | G/A      | 441   | 0.1  | missense           | CAC   | 22   | p.Arg896His | c.2687G>A  | 1.0  | 0.0      | 29.0     |
| 3D Organoids | CTNNB1 | chr3:41224642-41224643  | SNV   | 1      | C/T      | 257   | 1    | missense           | TTT   | 3    | p.Ser45Phe  | c.134C>T   | 0.0  | 0.996    | 155.0    |
|              | KRAS   | chr12:25245345-25245346 | SNV   | 1      | C/T      | 1222  | 0.66 | missense           | GAC   | 2    | p.Gly13Asp  | c.38G>A    | 0.0  | 0.803    | 94.0     |
|              | GNAS   | chr20:58909366-58909367 | SNV   | 1      | G/A      | 336   | 0.52 | missense           | CAT   | 8    | p.Arg201His | c.602G>A   | 0.0  | 1.0      | 29.0     |
| 2D Cells     | CTNNB1 | chr3:41224642-41224643  | SNV   | 1      | C/T      | 868   | 1    | missense           | TTT   | 3    | p.Ser45Phe  | c.134C>T   | 0.0  | 0.996    | 155.0    |
|              | KRAS   | chr12:25245345-25245346 | SNV   | 1      | C/T      | 1991  | 0.66 | missense           | GAC   | 2    | p.Gly13Asp  | c.38G>A    | 0.0  | 0.803    | 94.0     |
|              | GNAS   | chr20:58909366-58909367 | SNV   | 1      | G/A      | 1269  | 0.49 | missense           | CAT   | 8    | p.Arg201His | c.602G>A   | 0.0  | 1.0      | 29.0     |

**Supplementary Table 1.** Deep sequencing of a 161-gene panel (ThermoFisher OncoPrint Comprehensive Assay v.3) comparing germline DNA against tumor (from third surgery) or its derivatives, with variant allele frequency (VAF) for somatic mutation detection threshold at 0.02.
